# Supplementary material
Source: PubMed Central journal article supplement (PMC6919244)
Supplement: Supp_Tables1-4.pdf [file Supp_Tables1-4.pdf]

SUPPLEMENTARY TABLE S1. ANTIBODIES USED IN FLOW CYTOMETRY ANALYSIS

| <i>Antibody</i>        | <i>Fluorochrome</i> | <i>Company-catalog number</i> |
|------------------------|---------------------|-------------------------------|
| Mouse anti-human CD34  | APC                 | BD Pharmingen-555824          |
| Mouse anti-human CD146 | FITC                | Bio Rad-MCA2141F              |
| Mouse anti-human CD45  | APC-cy7             | BD Pharmingen-557833          |
| Mouse anti-human CD31  | APC-cy7             | Bio Legend-303119             |
| Mouse anti-human CD90  | FITC                | BD Pharmingen-555595          |
| Mouse anti-human CD105 | PE-CF594            | BD Pharmingen-562380          |
| Mouse anti-human CD73  | PE                  | BD Pharmingen-561014          |
| Mouse anti-human CD44  | Alexa Fluor 7000    | BD Pharmingen-561289          |

SUPPLEMENTARY TABLE S2. PERIVASCULAR STEM/STROMAL CELLS ISOLATION PROTOCOL DETAILS

| <i>MicroBeads</i> | <i>Product number</i> | <i>Bead dilution</i> | <i>Cell density</i>             | <i>Incubation</i> | <i>Column</i>  |
|-------------------|-----------------------|----------------------|---------------------------------|-------------------|----------------|
| Anti-CD31         | 130-091-935           | 1:5                  | $1 \times 10^7/60 \mu\text{L}$  | 15 min, 4°C       | LD-130-042-901 |
| Anti-CD45         | 130-045-801           | 1:5                  | $1 \times 10^7/80 \mu\text{L}$  | 15 min, 4°C       | LD-130-042-901 |
| Anti-CD34         | 130-046-702           | 1:5                  | $1 \times 10^8/300 \mu\text{L}$ | 30 min, 4°C       | LS-130-042-401 |
| Anti-CD146        | 130-093-596           | 1:5                  | $1 \times 10^7/60 \mu\text{L}$  | 15 min, 4°C       | MS-130-042-201 |

SUPPLEMENTARY TABLE S3. QUANTITATIVE REAL-TIME POLYMERASE CHAIN REACTION PRIMERS

| <i>Gene</i>                    | <i>Forward</i>                | <i>Reverse</i>                 |
|--------------------------------|-------------------------------|--------------------------------|
| <i>ACTB</i>                    | 5'-CTGGAACGGTGAAGGTGACA-3'    | 5'-AAGGGACTTCCTGTAACAATGCA-3'  |
| <i>CEBP<math>\alpha</math></i> | 5'-TGGACAAGAAGCAACGAGTA-3'    | 5'-ATTGTCAGTGGTCAGCTCCAG-3'    |
| <i>COL2</i>                    | 5'-CCGCGGTGAGCCATGATTCG-3'    | 5'-CAGGCCCAGGAGGTCCTTTGGG-3'   |
| <i>FABP4</i>                   | 5'-ACGAGAGGATGATAAACTGGTGG-3' | 5'-GCGAACTTCAGTCCAGGTCAAC-3'   |
| <i>LPL</i>                     | 5'-TTGCAGAGAGAGGACTCGGA-3'    | 5'-GGAGTTGCACCTGTATGCCT-3'     |
| <i>OPN</i>                     | 5'-CCTCCTAGGCATCACCTGTG-3'    | 5'-CCACACTATCACCTCGGCC-3'      |
| <i>OSX</i>                     | 5'-GCCAGAAGCTGTGAAACCTC-3'    | 5'-GCTGCAAGCTCTCCATAACC-3'     |
| <i>PPAR<math>\gamma</math></i> | 5'-GGGGTGATGTGTTTGAACCTG-3'   | 5'-GACAGGAAAGACAACAGACAAATC-3' |
| <i>RUNX2</i>                   | 5'-ATGGCGGGTAACGATGAAAAT-3'   | 5'-ACGGCGGGGAAGACTGTGC-3'      |

SUPPLEMENTARY TABLE S4. ANIMAL ALLOCATION

| <i>Treatment group</i> | <i>Scaffold</i>            | <i>Cell number</i>    | <i>Defect number</i> |
|------------------------|----------------------------|-----------------------|----------------------|
| Empty                  | —                          | —                     | 6                    |
| Scaffold alone         | Hydroxyapatite-coated PLGA | —                     | 6                    |
| MACS-derived PSC       | —                          | $2.5 \times 10^5$ PSC | 6                    |
| MACS-derived PSC+ODM   | —                          | $2.5 \times 10^5$ PSC | 4                    |

MACS, magnetic-activated cell sorting; PLGA, poly(lactic-co-glycolic acid); PSC, perivascular stem/stromal cells.
